# Supplementary material for: Comparison of triglyceride glucose index and modified triglyceride glucose indices in prediction of cardiovascular diseases in middle aged and older Chinese adults
Source: PubMed Central journal article supplement (PMC11138075; doi:10.1186/s12933-024-02278-z), 2024-05-29
Supplement: 12933_2024_2278_MOESM1_ESM.pdf [file 12933_2024_2278_MOESM1_ESM.pdf]

## Additional File

### Comparison Between Triglyceride Glucose Index and Modified Indices to Predict New-Onset Cardiovascular Disease in Middle-Aged and Older Adults

Cancan et. al,

**Fig. S1-S4.** **Fig. S1** [K–M plot of cardiovascular diseases by the tertile groups of TyG and modified indices]. **Fig. S2** [K–M plot of coronary heart diseases by the tertile groups of TyG and modified indices]. **Fig. S3** [K–M plot of stroke by the tertile groups of TyG and modified indices]. **Fig. S4** [Sex-specific time-dependent predictive capacity of TyG and modified indices for cardiovascular diseases, coronary heart disease and stroke]

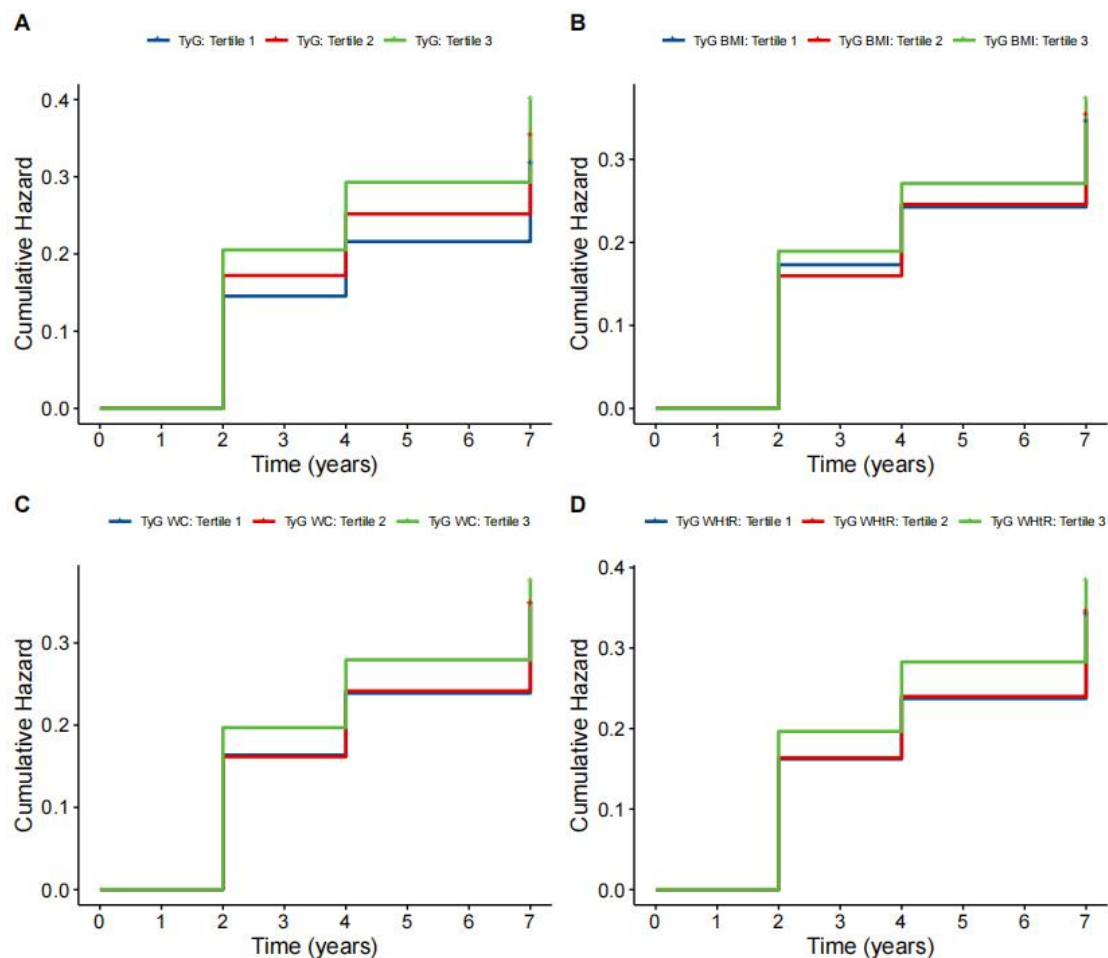

**Fig. S1** [K–M plot of cardiovascular diseases by the tertile groups of TyG and modified indices].

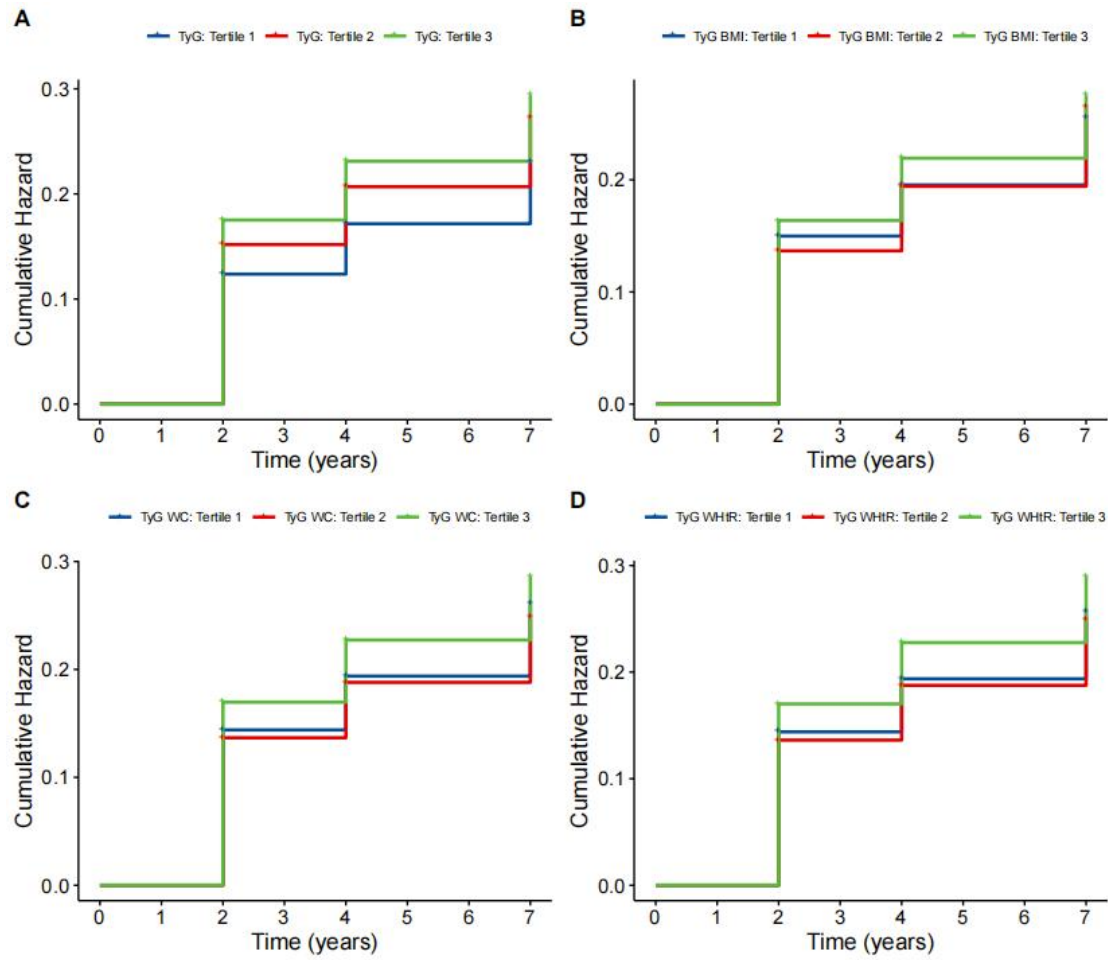

**Fig. S2** [K–M plot of coronary heart diseases by the tertile groups of TyG and modified indices].

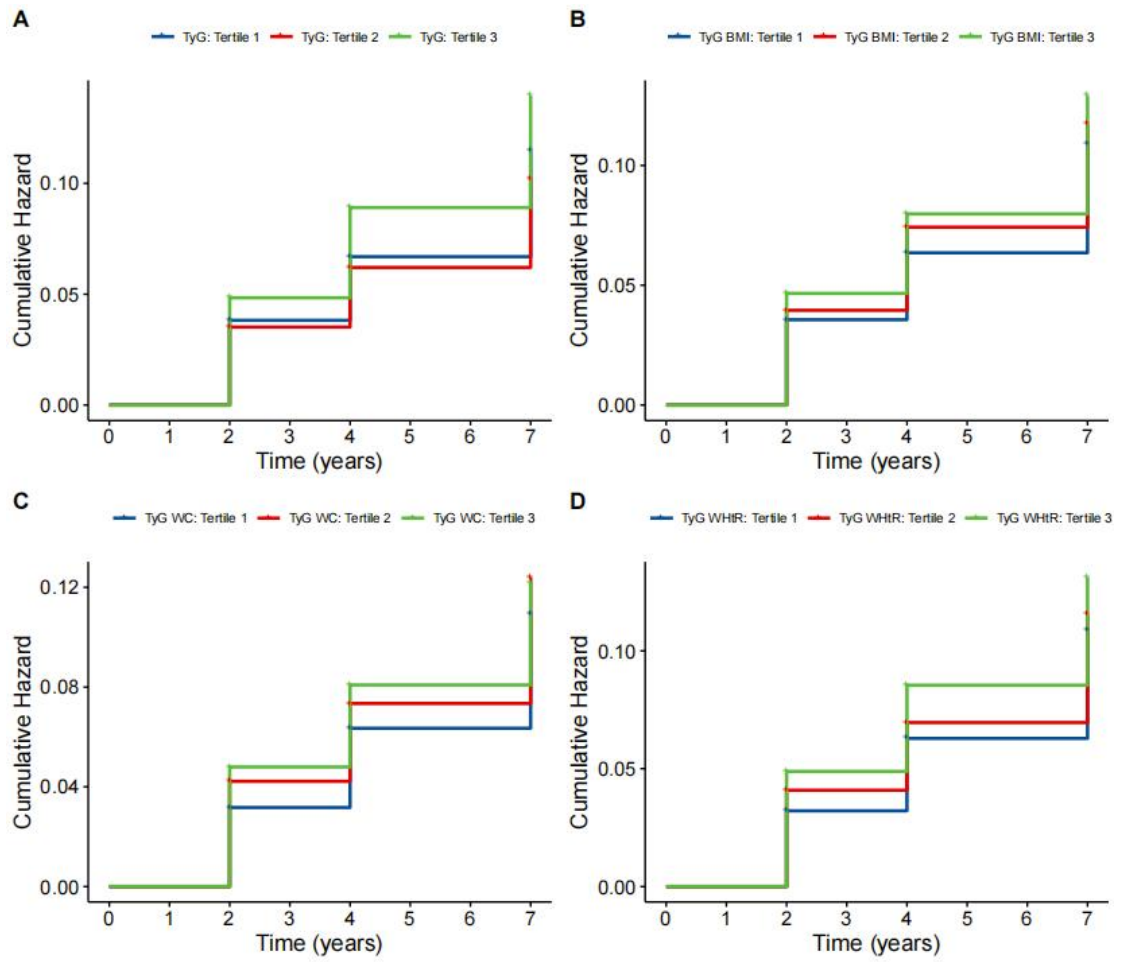

**Fig. S3** [K-M plot of stroke by the tertile groups of TyG and modified indices].

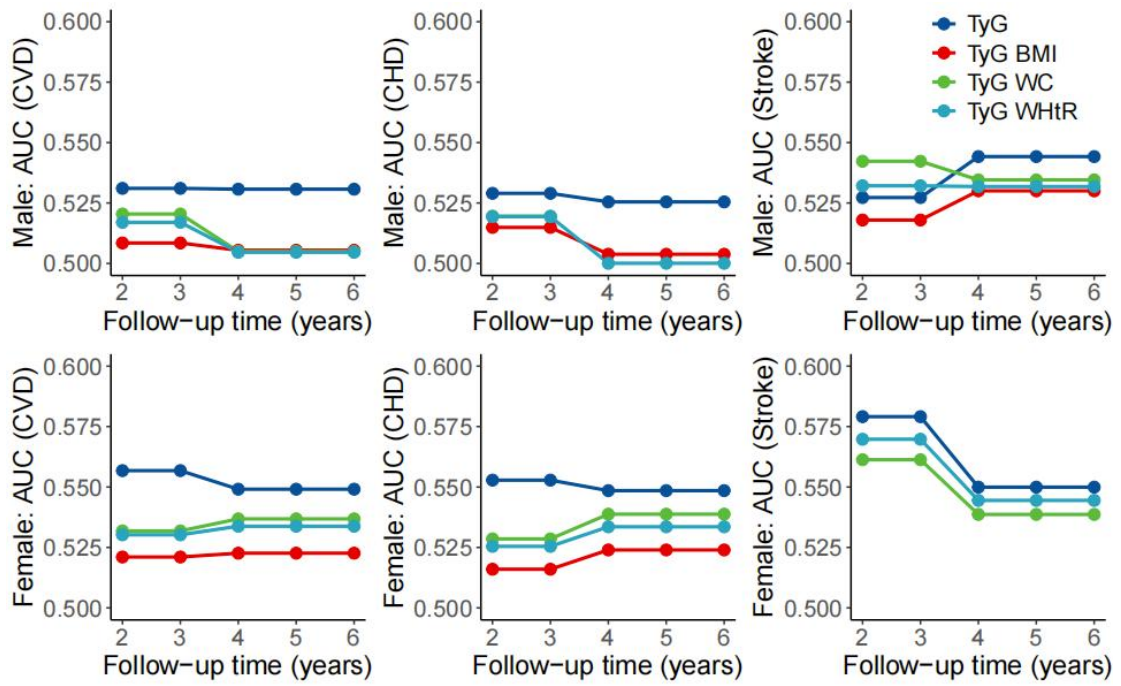

**Fig. S4** [Sex-specific time-dependent predictive capacity of TyG and modified indices for cardiovascular diseases, coronary heart disease and stroke]
